# Supplementary material for: Crystalline forms and aqueous solubilities of an IBSdrug, tegaserod
Source: Royal Society of Chemistry journal article supplement (doi:10.1039/b714374p), 2007-10-05
Supplement: b714374p.pdf [file b714374p.pdf]

# Crystalline forms and aqueous solubilities of an IBS drug, Tegaserod

R. Srivijaya, Peddy Vishweshwar,\* B. R. Sreekanth and K. Vyas\*

Department of Analytical Research, Discovery Research, Dr. Reddy's Laboratories Ltd., Miyapur, Hyderabad, 500 049, India. Fax: 91 040 23045440; Tel: 91 040 23045439

E-mail: vishweshwarp@drreddys.com; vyask@drreddys.com

## Electronic Supplementary Information (ESI)

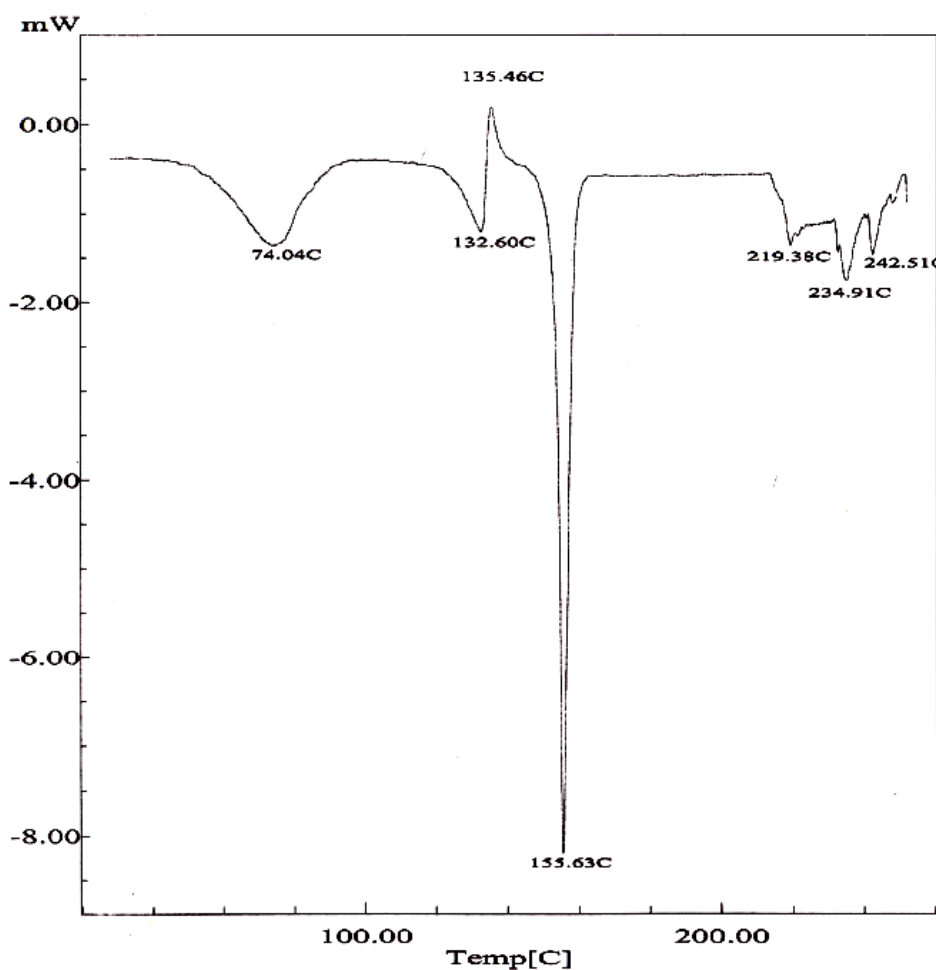

Fig. S1: DSC of Tegaserod free base monohydrate (TFBH).

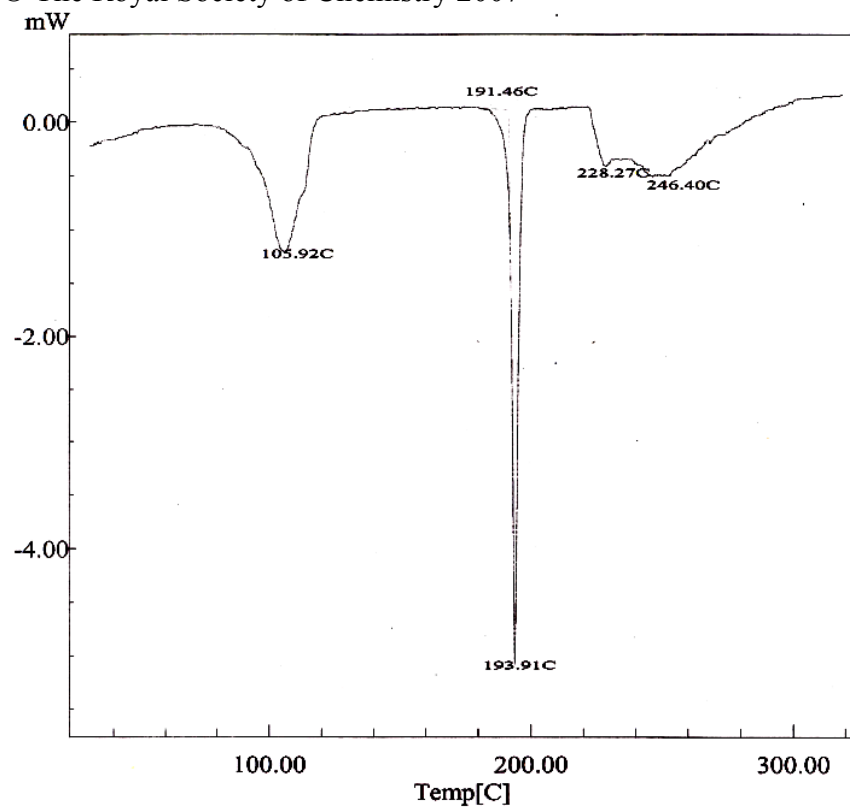

**Fig. S2** DSC of Tegaserod nicotinate salt methanol solvate (TNM). Notice methanol solvent loss between 80-120 °C and the salt melting at 193.9 °C.

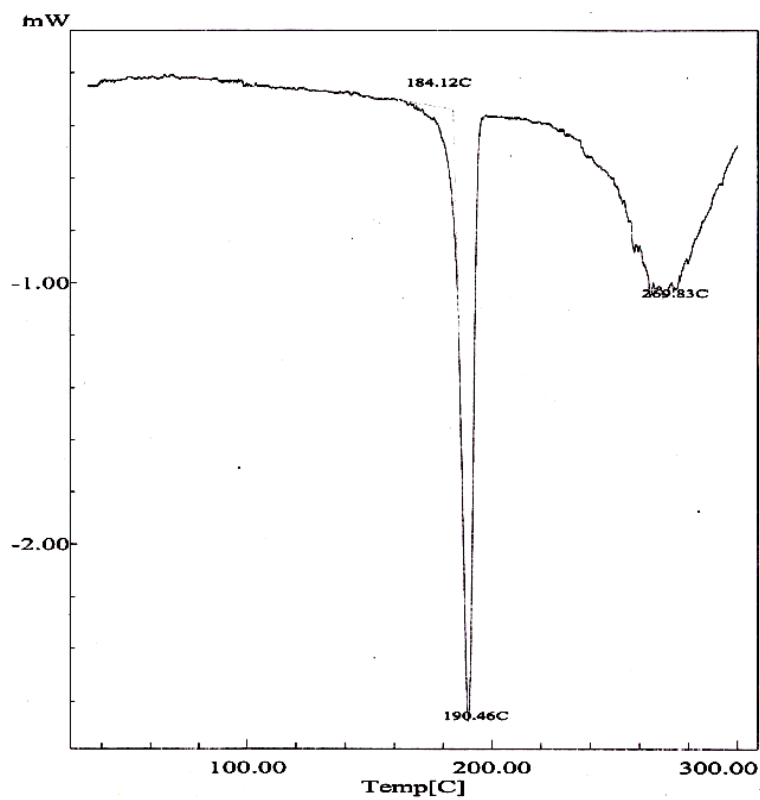

**Fig. S3** DSC of anhydrous Tegaserod nicotinate salt (TN).
